# Supplementary material for: Unraveling Drought Tolerance and Sensitivity in Coffee Genotypes: Insights from Seed Traits, Germination, and Growth-Physiological Responses
Source: Preprints.org preprint supplement (doi:10.20944/preprints202307.1190.v1), 2023-07-18
Supplement: Supplementary file 1 [file Supplementary Tables.xlsx]

## Sheet: Table S1
	Table S1. Parameters tested in this study.
	Crop stage	Growth stage	Parameter description	Parameter	Unit
	Coffee seeds	Pre-germination	Seed Length	Sl	mm
			Seed Width	Sw	mm
			Seed Surface area	SA	mm2
			Seed Volume	SV	mm3/cm3
			Seed Fresh weight	Fw	g
			Seed Dry weight	Dw	g
			Moisture content-dry basis	Mc-dry	%
		Germination	Germination percentage	GP	%
			Mean germination time	MGT	day
			Coefficient of variation of germination time	CVt	%
			Coefficient of velocity of germination	CVG	%
			Germination index	GI	seed/day
			Germination rate index	GRI	%/day
			Uncertainity of germination process	U	bit
			Synchronization index	Z	unit less
			Mean daily germination Percent	MGD	%
			Peak value for germination	Pv	day-1
			Germination value	Gv	unit less
	Coffee seedling, 90 days after germination	Post-germination	Seedlings Root length	Rl	mm
			Shoot length	SdL	mm
			Root number	Rn	number
			Root to shoot ratio	R/Sr	unit less
			Seedling vigour index	VI	unit less
	Adult coffee plant, after developing 7-8 pairs of leaves	Shoot growth	Stem height	SH	cm
			Stem collar diameter	SD	mm
			Leaf number	LN	number
			Leaf area	LA	cm2
		Root growth	Tap root length	RL	cm
			Root number	RN	number
			Root volume	RV	cm3
		Biomass	Root fresh mass	RFM	g
			Leaf fresh mass	LFM	g
			Stem fresh mass	SFM	g
			Total fresh mass	TFM	g
			Rootdry mass	RDM	g
			Leaf dry mass	LDM	g
			Stem dry mass	SDM	g
			Total dry mass	TDM	g
		Water contents	Leaf relative water content	RWC	%
			Stem water potential	Ψw	,-Mpa
		Gas exchanges	Net carbon assimilation	A	µmol m-2 s-1
			Stomatal conductance	Gs	mmol m-2 s-1
			Transpiration rate	E	mmol m-2 s-1
		Pigments	Contents of chlorophyll a	Chl-a	mg g-1 FW
			Contents of chlorophyll a	Chl-b	mg g-1 FW
			Contents of total chlorophyll	T. chl	mg g-1 FW
		Cell membrane stability	Cell membrane stability	CMS	%
			Relative cell injury	RCI	%

## Sheet: Table S2
Table S2. Mean values and SD of pre-germination parameters.
Varities	Fw,g	SD ±	Dw, g	SD ±	Mc-dry, %	SD ±	Sl,mm	SD ±	Sw, mm	SD ±	SA, mm2	SD ±	SV, mm3	SD ±	SA/SV	SD ±
Ca754	0.161	0.0015	0.149	0.002	8.05369	0.175	7	0.213	7.4	0.224	51.8	2.46	200.604	12.34	0.25822	0.01
CaJ19	0.204	0.002	0.184	0.0018	10.8696	0.19	7.3	0.213	7.3	0.133	53.29	2.92	203.586	9.45	0.261757	0.03
CaGeisha	0.186	0.001	0.167	0.0022	11.3772	0.16	7.2	0.18	7.3	0.153	52.56	1.75	200.797	11.67	0.261757	0.01
CaJ21	0.2	0.0031	0.179	0.002	11.7318	0.255	7.6	0.213	7.1	0.133	53.96	2.25	200.497	10.03	0.269131	0.02
Ca74165	0.173	0.001	0.154	0.0017	12.3377	0.135	8.6	0.306	7.4	0.1	63.64	1.75	246.457	8.47	0.25822	0.02
Ca74158	0.193	0.0011	0.171	0.0017	12.8655	0.14	8.8	0.291	7.2	0.153	63.36	1.85	238.74	10.32	0.265393	0.01
Ca74110	0.165	0.0026	0.144	0.0012	14.5833	0.19	8.9	0.233	7.1	0.153	63.19	2.56	234.793	9.24	0.269131	0.03
Ca74112	0.1973	0.0012	0.172	0.0027	14.7093	0.195	9.6	0.267	7	0.233	67.2	1.6	246.176	10.24	0.272975	0.01
Ca74140	0.1999	0.002	0.174	0.001	14.8851	0.15	9.9	0.233	6.9	0.1	68.31	1.89	246.667	9.33	0.276932	0.02

## Sheet: Table S3
Table S3. Mean values and SD for germination perameters.
Genotypes	GP %	SD ±	MGT	SD ±	CVt	SD ±	CVG	SD ±	GI	SD ±	U	SD ±	Z	SD ±	MDG	SD ±	Pv	SD ±	Gv	SD ±	GRI	SD ±
Ca754	35	2.67	17.5238	0.27	2.92041	0.03	5.70652	0.85	1.19935	0.3	0.998364	0.14	0.47619	0.044	1.4	0.19	1.94444	0.37	2.72222	0.89	1.99346	0.65
CaJ19	45	2.21	16.2727	0.21	3.84776	0.02	6.14525	0.62	2.03088	0.42	1.32218	0.12	0.420455	0.02	2.2	0.1	3.23529	0.47	7.11765	0.11	3.3848	0.43
CaGeisha	55	2.46	16.0909	0.36	5.00168	0.03	6.21469	0.56	2.05564	0.51	1.49111	0.14	0.4375	0.052	2.2	0.06	3.05556	0.18	6.72222	0.97	3.42606	0.76
CaJ21	55	2.92	13.7778	0.32	3.07495	0.04	7.25806	0.87	1.96154	0.11	0.764205	0.1	0.641026	0.04	1.8	0.17	3.21429	0.22	5.78571	0.88	3.26923	0.88
Ca74165	60	1.75	13.3333	0.25	4.74342	0.03	7.5	0.98	2.70604	0.28	1.32501	0.16	0.414286	0.03	2.4	0.08	4.28571	0.44	10.2857	1.1	4.51007	0.16
Ca74158	65	1.85	14.1538	0.35	3.81455	0.044	7.06522	1.21	2.75934	0.48	1.14012	0.09	0.526316	0.02	2.6	0.05	4.33333	0.53	11.2667	1.24	4.5989	0.53
Ca74110	75	1.56	10.0667	0.26	18.1448	0.02	9.93377	1.5	4.61302	0.62	2.60624	0.13	0.2	0.03	3	0.19	5.5	0.45	16.5	1.36	7.68837	0.75
Ca74112	80	1.74	9.5	0.24	20.9404	0.052	10.5263	1.82	5.24993	0.26	2.60846	0.18	0.194149	0.04	3.2	0.18	6.11111	0.44	19.5556	1.04	8.74988	1.06
Ca74140	90	1.44	11.6111	0.24	10.0961	0.04	8.61244	1.05	4.69902	0.51	2.16904	0.18	0.251572	0.03	3.6	0.15	6.53846	0.27	23.5385	1.18	7.8317	1.01

## Sheet: Table S4
Table S4. Mean values and SD of stem height (cm).
	DADB	Ca754				CaJ-19				Ca74110				Ca74112
		ww		ws		ww		ws		ww		ws		ww		ws
		M	SD	M	SD	M	SD	M	SD	M	SD	M	SD	M	SD	M	SD
	0	3	0.196	3	0.235	4.9	0.0913	4.88	0.214	7.1	0.204	7	0.129	9.28	0.075	9.75	0.05
	10	4.25	0.132	4.2	0.314	6.13	0.0479	6.12	0.202	8.3	0.213	8.22	0.107	10.49	0.0826	10.963	0.0554
	20	7.68	0.138	7.57	0.275	9.53	0.0629	9.45	0.227	11.7	0.204	11.54	0.0826	13.85	0.0866	14.317	0.0415
	30	11.61	0.145	8.59	0.282	13.48	0.0479	10.45	0.204	15.65	0.183	12.55	0.108	17.8	0.0645	15.313	0.0375
	40	15.7	0.15	9.88	0.256	17.58	0.0702	11.75	0.208	19.76	0.202	13.85	0.108	21.92	0.0778	16.6	0.0289
	50	18.08	0.165	10.91	0.285	19.99	0.0688	12.76	0.205	22.15	0.204	14.86	0.12	24.3	0.0645	17.6	0.0354
	60	23.15	0.196	11.38	0.295	25.08	0.0854	13.25	0.187	27.21	0.175	15.35	0.0913	29.41	0.0688	18.137	0.0427

## Sheet: Table S5
Table S5. Mean values and SD of stem diameter (mm).
	DADB	Ca754				CaJ-19				Ca74110				Ca74112
		ww		ws		ww		ws		ww		ws		ww		ws
		M	SD	M	SD	M	SD	M	SD	M	SD	M	SD	M	SD	M	SD
	0	1.975	0.0479	1.9	0.108	1.567	0.0568	1.613	0.0826	2.05	0.0866	2.038	0.208	2.225	0.16	2.075	0.0479
	10	2.43	0.0332	2.405	0.131	1.98	0.0913	2.03	0.119	2.58	0.0816	2.518	0.225	2.705	0.193	2.555	0.0479
	20	2.9	0.0645	2.795	0.111	2.475	0.0629	2.533	0.0898	3	0.0866	2.97	0.202	3.175	0.197	2.995	0.0854
	30	3.442	0.0545	3.032	0.119	3.002	0.0669	2.74	0.0712	3.51	0.05	3.172	0.22	3.685	0.193	3.257	0.0719
	40	3.88	0.05	3.072	0.113	3.468	0.0625	2.763	0.0794	3.98	0.0866	3.202	0.215	4.155	0.197	3.285	0.0731
	50	4.39	0.0289	3.12	0.105	3.98	0.0678	2.82	0.0881	4.49	0.05	3.24	0.218	4.692	0.184	3.313	0.0708
	60	4.88	0.05	3.11	0.121	4.49	0.0594	2.843	0.0826	5.018	0.0515	3.27	0.206	5.192	0.182	3.337	0.0778

## Sheet: Table S6
Table S6. Mean values and SD of leaf number.
	DADB	Ca754				CaJ-19				Ca74110				Ca74112
		ww		ws		ww		ws		ww		ws		ww		ws
		M	SD	M	SD	M	SD	M	SD	M	SD	M	SD	M	SD	M	SD
	0	6	0	6	0	6.5	0.5	6.5	0.5	7	0.577	7	0.577	7.5	0.5	7.5	0.5
	10	8	0	8	0	8.5	0.5	8.5	0.5	9	0.577	9	0.577	9.5	0.5	9.5	0.5
	20	8	0	8	0	8.5	0.5	8.5	0.5	9	0.577	9	0.577	9.5	0.5	9.5	0.5
	30	8	0	8	0	8.5	0.5	8.5	0.5	9	0.577	9	0.577	9.5	0.5	9.5	0.5
	40	10	0	8	0	10.5	0.5	8.5	0.5	11	0.577	9	0.577	11.5	0.5	9.5	0.5
	50	12	0	8	0	12.5	0.5	8.5	0.5	13	0.577	9	0.577	13.5	0.5	9.5	0.5
	60	16	0	8	0	16.5	0.5	8.5	0.5	17	0.577	9	0.577	17.5	0.5	9.5	0.5

## Sheet: Table S7
Table S7. Mean values and SD of leaf area (cm2).
	DADB	Ca754				CaJ-19				Ca74110				Ca74112
		ww		ws		ww		ws		ww		ws		ww		ws
		M	SD	M	SD	M	SD	M	SD	M	SD	M	SD	M	SD	M	SD
	0	7.75	0.73	7.675	0.18	8.348	1.527	8.24	0.679	11.157	1.63	10.825	0.724	14.793	0.754	15.415	0.382
	10	9.14	0.735	9.013	0.175	9.738	1.562	9.625	0.709	12.523	1.641	12.16	0.733	16.157	0.75	16.75	0.384
	20	10.73	0.73	10.305	0.199	11.328	1.527	10.945	0.735	14.113	1.616	13.48	0.731	17.748	0.771	18.045	0.398
	30	12.59	0.73	10.578	0.176	13.192	1.531	11.215	0.709	15.97	1.614	13.75	0.733	19.655	0.738	18.358	0.387
	40	14.51	0.73	10.668	0.176	15.11	1.529	11.323	0.715	17.892	1.615	13.855	0.724	21.532	0.76	18.445	0.382
	50	17.07	0.735	10.7	0.176	17.675	1.534	11.342	0.718	20.453	1.616	13.875	0.724	24.078	0.749	18.468	0.382
	60	19.85	0.697	10.717	0.176	20.435	1.568	11.363	0.718	23.233	1.616	13.895	0.724	26.868	0.771	18.488	0.381

## Sheet: Table S8
Table S8. Mean values and SD of root length (cm), root number, and root volume (cm3).
	60 DADB	Ca754				CaJ-19				Ca74110				Ca74112
		ww		ws		ww		ws		ww		ws		ww		ws
		M	SD	M	SD	M	SD	M	SD	M	SD	M	SD	M	SD	M	SD
	Root length	19.2	1.641	10.9944	0.207	23.5	1.615	14.0256	1.565	20.7	0.2308	15.1638	0.238	20.9	0.108	16.1253	1.534
	Root number	47.3	1.648	26.5125	0.227	51.5	1.641	30.7369	1.41	48.5	0.225	35.5288	0.125	51.4	0.136	40.1493	1.552
	Root volume	5.4	0.316	3.15158	0.206	8.3	1.648	4.94375	0.58	6.7	0.156	5.11513	0.124	7.5	0.131	5.86848	1.568

## Sheet: Table S9
Table S9. Mean values and SD of relative water content (%).
	DADB	Ca754				CaJ-19				Ca74110				Ca74112
		ww		ws		ww		ws		ww		ws		ww		ws
		M	SD	M	SD	M	SD	M	SD	M	SD	M	SD	M	SD	M	SD
	0	81.173	0.0178	81.153	0.0485	81.597	0.0304	81.64	0.0212	81.79	0.0235	81.553	0.222	82.885	0.694	82.79	0.642
	10	81.22	0.0187	72.828	0.032	81.722	0.225	72.34	0.0212	81.912	0.604	76.102	0.262	83.02	0.527	77.59	0.642
	20	81.213	0.0202	64.827	0.0697	81.852	0.256	66.315	0.0437	81.463	0.444	68.602	0.268	82.763	0.668	72.54	0.745
	30	81.162	0.025	57.553	0.0485	81.57	0.179	59.303	0.177	81.697	0.388	62.252	0.596	82.86	0.373	67.29	0.642
	40	81.188	0.0138	49.578	0.0586	81.865	0.234	49.49	0.257	81.825	0.142	56.648	0.22	82.89	0.612	62.193	0.676
	50	81.45	0.252	40.305	0.119	81.302	0.308	41.542	0.0979	81.922	0.351	48.553	0.469	82.32	0.465	54.84	0.745
	60	81.162	0.016	30.243	0.205	82.08	0.587	32.572	0.127	81.5	0.632	43.403	0.289	82.76	0.614	48.093	0.801

## Sheet: Table S10
Table S10. Mean values and SD of stem water potential (Ψw, -Mpa).
	DAT	Ca754				CaJ-19				Ca74110				Ca74112
		ww		ws		ww		ws		ww		ws		ww		ws
		M	SD	M	SD	M	SD	M	SD	M	SD	M	SD	M	SD	M	SD
	0	-1.442	0.0256	-1.442	0.0193	-1.442	0.0243	-1.433	0.0612	-1.445	0.0296	-1.438	0.018	-1.442	0.0272	-1.448	0.0202
	10	-1.488	0.0138	-1.718	0.0193	-1.41	0.0381	-1.748	0.0554	-1.398	0.0368	-1.67	0.0402	-1.445	0.0417	-1.668	0.0301
	20	-1.435	0.0328	-2.11	0.0268	-1.462	0.0206	-2.14	0.0599	-1.488	0.0214	-1.905	0.0155	-1.47	0.028	-1.905	0.0194
	30	-1.478	0.0298	-2.473	0.0193	-1.433	0.032	-2.43	0.0736	-1.408	0.0368	-2.168	0.018	-1.428	0.018	-2.152	0.0225
	40	-1.418	0.0295	-2.69	0.0316	-1.498	0.0193	-2.6	0.0736	-1.455	0.0524	-2.313	0.016	-1.452	0.0246	-2.268	0.0175
	50	-1.438	0.0266	-2.853	0.025	-1.445	0.0284	-2.773	0.0446	-1.435	0.0155	-2.44	0.0158	-1.472	0.0239	-2.398	0.0256
	60	-1.452	0.0315	-3.105	0.021	-1.448	0.0371	-3.02	0.0736	-1.442	0.0499	-2.64	0.0158	-1.48	0.00707	-2.558	0.0175

[truncated: 7 more sheets: Table S11, Table S12, Table S13, Table S14, Table S15, Table S16, Table S17]
